# Supplementary material
Source: publisher figshare collection journal article supplement (https://acs.figshare.com/ndownloader/files/8867023)
Supplement: Supplementary file 1 [file 8867023]

# Supporting information

## Self cross-linkable anionic waterborne polyurethane-silanol dispersions from cottonseed oil-based phosphorylated polyol as ionic soft segment

Sashivinay Kumar Gaddam <sup>1</sup>, S. N. Raju Kutcherlapati <sup>2</sup>, Aruna Palanisamy <sup>1\*</sup>

<sup>1</sup>Polymers & Functional Materials Division, Indian Institute of Chemical Technology, Uppal road, Tarnaka, Hyderabad-500007, Telangana state, India.

<sup>2</sup>School of chemistry, University of Hyderabad, Prof CR Rao road, CUC, Gachibowli, Hyderabad-500046, Telangana state, India.

\*Email: [aruna@iict.res.in](mailto:aruna@iict.res.in), [arunap73@rediffmail.com](mailto:arunap73@rediffmail.com); Tel +91 04027191447.

Number of pages in the supporting information: 9

Number of schemes in the supporting information: 1

Number of figures in the supporting information: 9

### Supporting information

Scheme S1. Synthesis of the Epoxidized Cottonseed oil (ECSO)

Figure S1. Visual appearance of phospols.

Figure S2. Visual appearance of PUDs (a) PUD-P5 (b) PUD-P10 (c) PUD-P15.

Figure S3. Probable mechanism of Phospol-PUD film curing process through the formation of siloxane cross-links.

Figure S4. FT-IR spectra of **(a)** ECSO and Phospol ; **(b)** phospol-P5, P10, and P15.

Figure S5.  $^1\text{H}$  NMR spectra of ECSO and Phospol.

Figure S6.  $^{31}\text{P}$  NMR spectra of phospols.

Figure S7. Particle size distribution of phospol based PU dispersion.

Figure S8. DSC scans of phospol PUD films

Figure S9. TGA curves of phospol PUD films.

### Synthesis of the Epoxidized Cottonseed oil (ECSO)

The reaction takes place in a three necked flask equipped with mechanical stirrer, dropping funnel, and thermometer. Cottonseed oil charged into the reaction flask, mixed with formic acid (the molar ratio of the oil unsaturation & FA is 1:0.5) and sulfuric acid (2 wt% of  $\text{HCOOH}$  &  $\text{H}_2\text{O}_2$ ) at  $10\text{ }^\circ\text{C}$  for 30 minutes. Then solution of 30%  $\text{H}_2\text{O}_2$  (the molar ratio between the oil unsaturation and  $\text{H}_2\text{O}_2$  is 1:1.2) was added drop wise to the mixture under vigorous stirring for a period of 30 minutes. Once, the completion of  $\text{H}_2\text{O}_2$  addition, the reaction was continued for another 5h at  $60\text{ }^\circ\text{C}$ . At the end, the product mixture was extracted by ethyl acetate, and washed with deionized water and brine. The organic phase was dried over anhydrous  $\text{Na}_2\text{SO}_4$ , filtered and concentrated in vacuum to yield the product ECSO as yellow liquid.

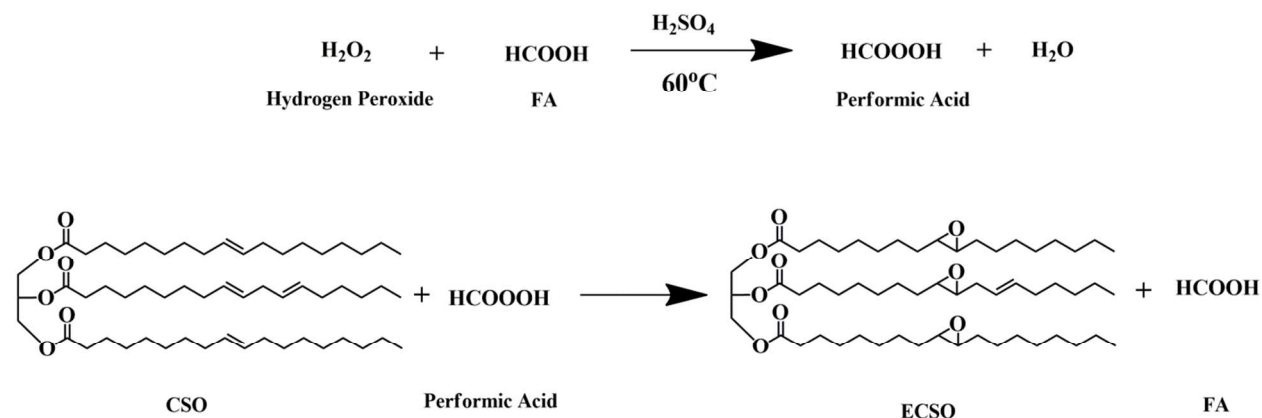

**Scheme S1.** Synthesis of epoxy cotton seed oil (ECSO)

### Additional figures

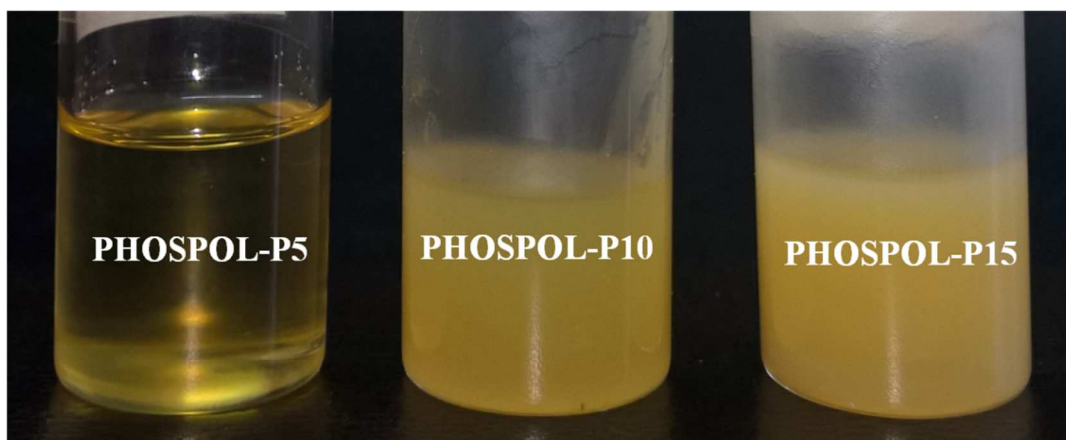

**Figure S1.** Visual appearance of phospols.

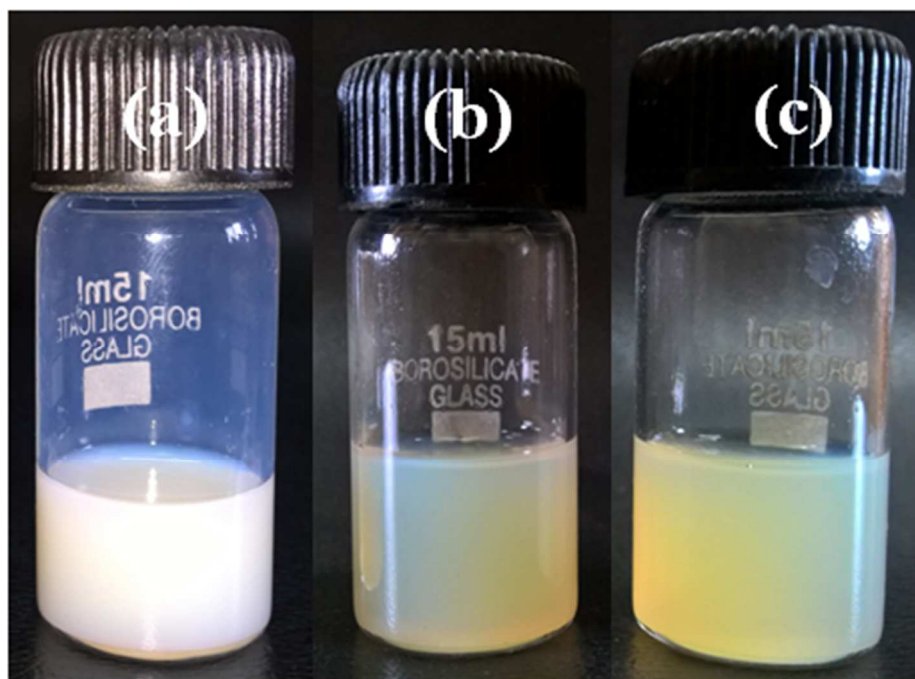

**Figure S2.** Visual appearance of PUDs (a) PUD-P5 (b) PUD-P10 (c) PUD-P15.

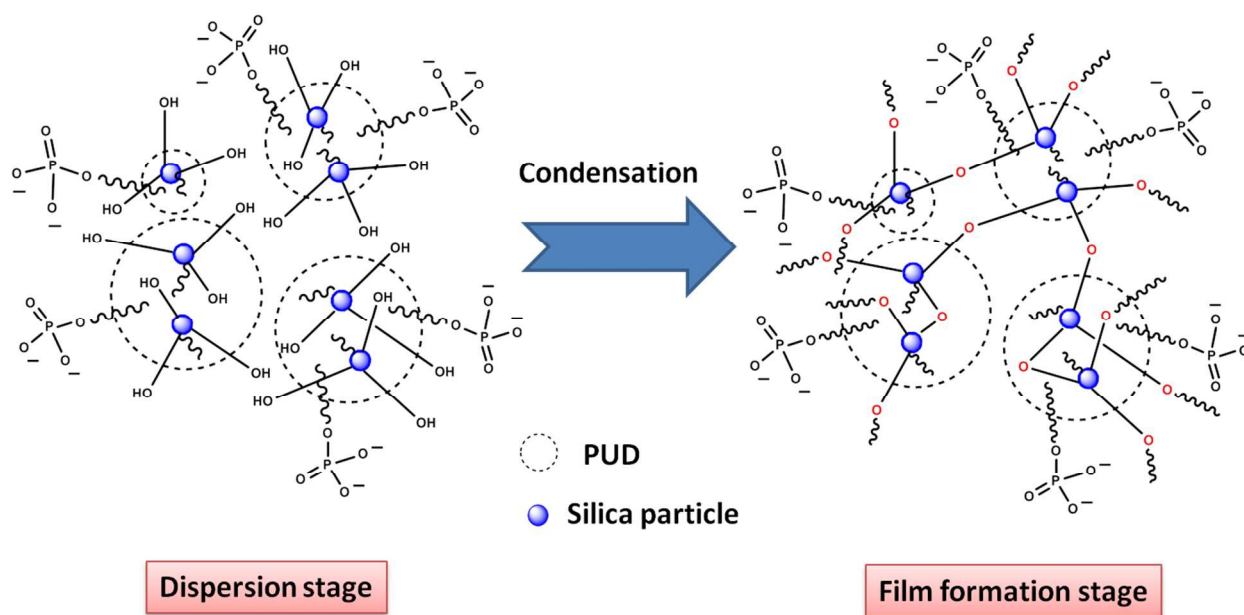

**Figure S3.** Probable mechanism of Phospol-PUD film curing process through the formation of siloxane cross-links.

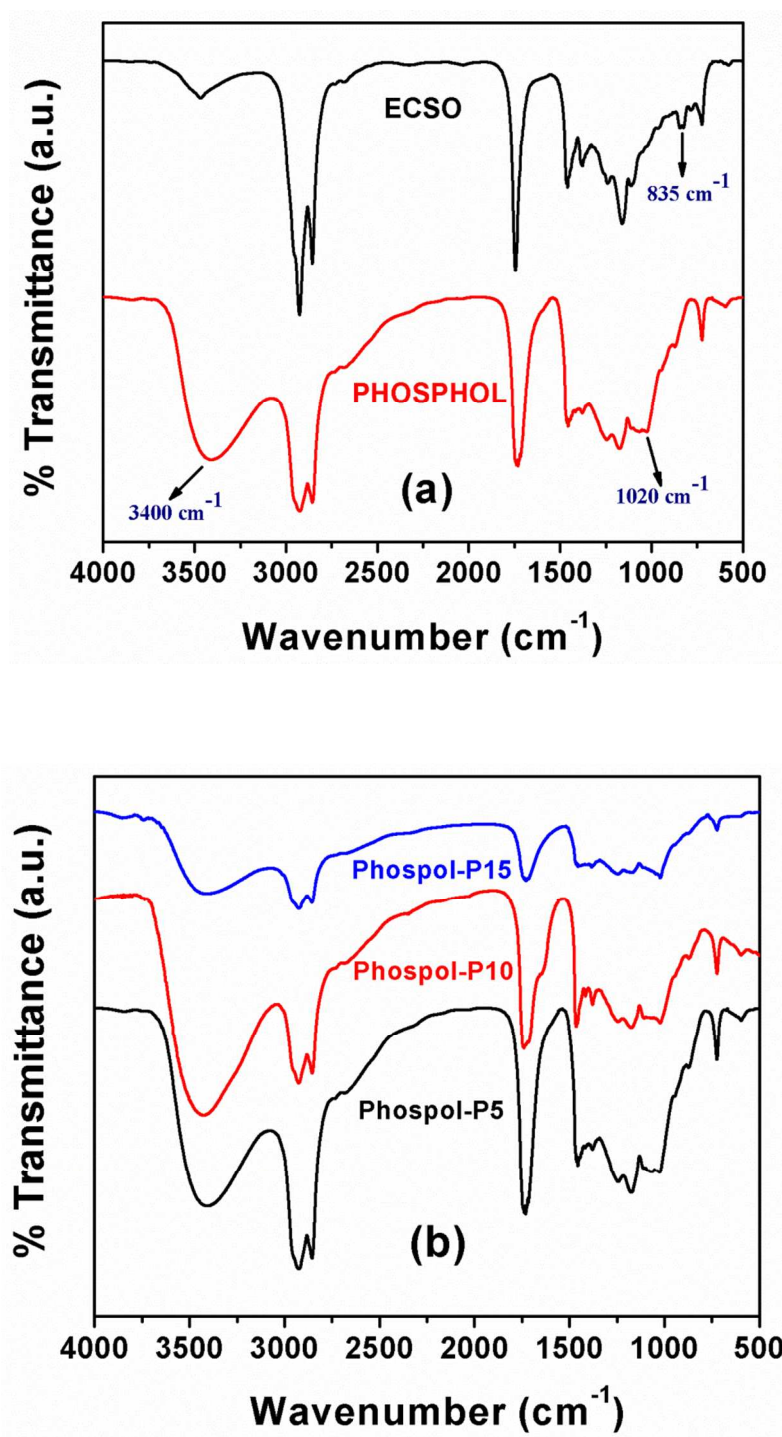

**Figure S4.** FT-IR spectra of (a) ECSO and Phospol ; (b) phospol-P5, P10, and P15.

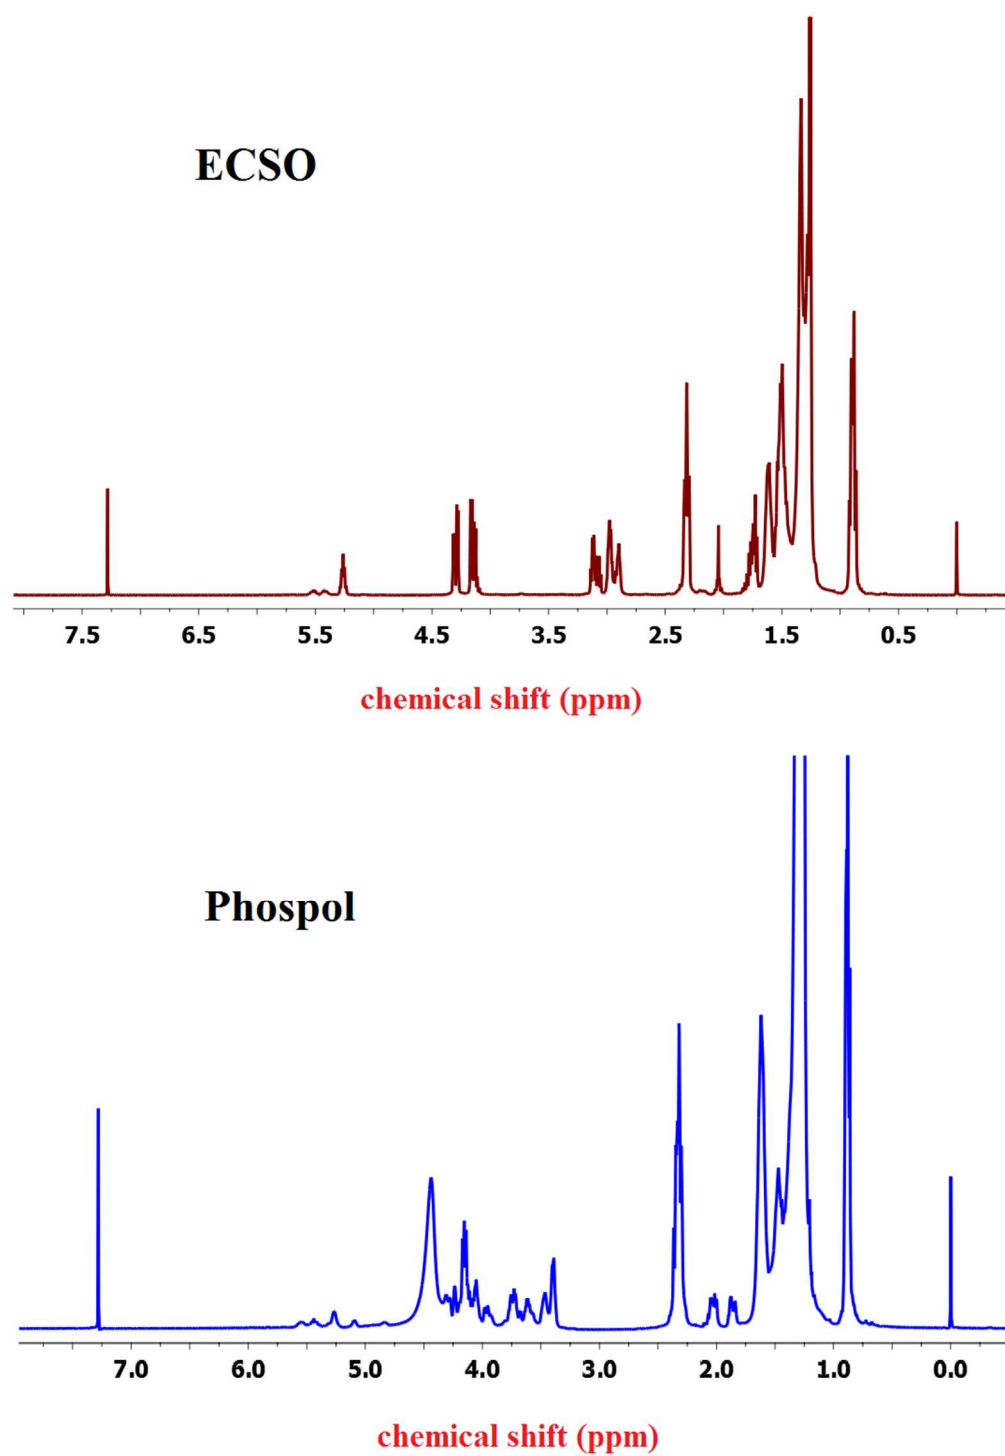

**Figure S5.**  $^1\text{H}$  NMR spectra of ECSO and Phospol.

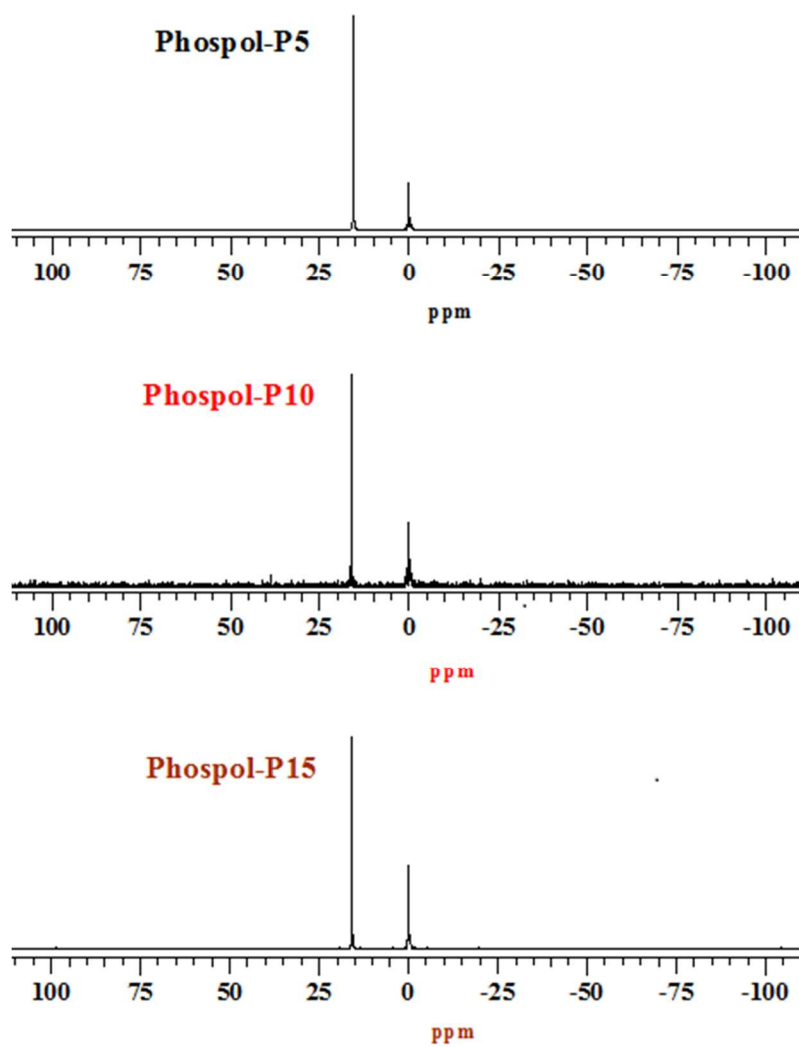

**Figure S6.**  $^{31}\text{P}$  NMR spectra of phospols.

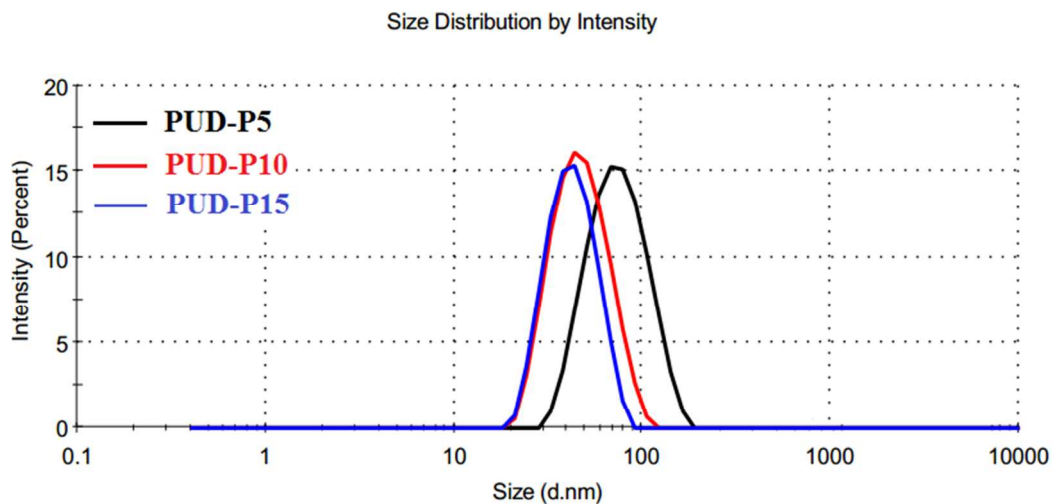

**Figure S7.** Particle size distribution of phosfol based PU dispersion.

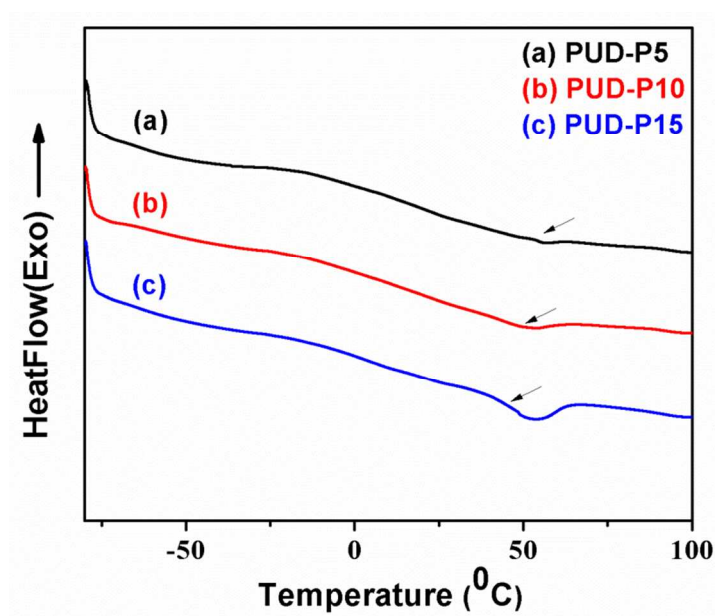

**Figure S8.** DSC scans of phosfol PUD films



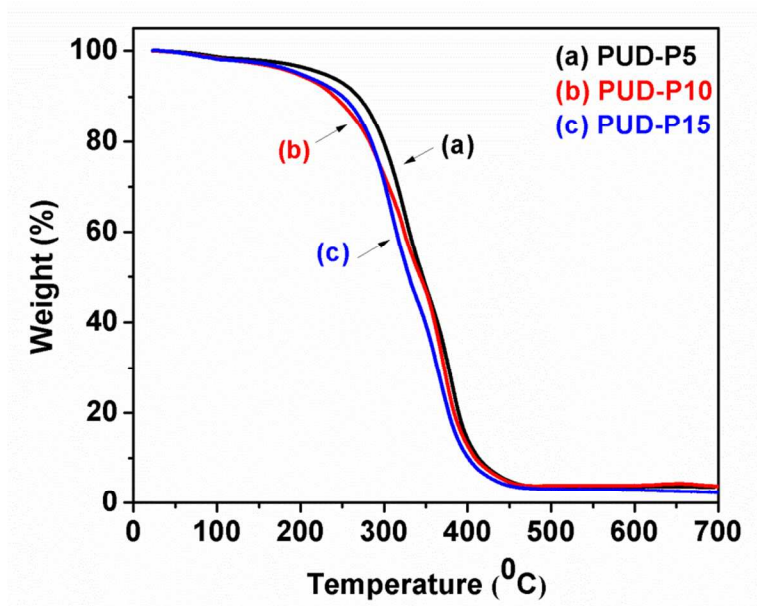

**Figure S9.** TGA curves of phospol PUD films.
